# Supplementary material for: Nylon 6,6/graphene nanoplatelet composite films obtained from a new solvent
Source: Royal Society of Chemistry journal article supplement (doi:10.1039/c5ra23647a), 2016-01-01
Supplement: c5ra23647a1.pdf [file c5ra23647a1.pdf]

## Supporting Information

### Nylon 6,6/graphite nanoplate composite films obtained from a new solvent

Evie L. Papadopoulou<sup>a</sup>, Francesca Pignatelli<sup>a</sup>, Sergio Marras<sup>b</sup>, Lara Marini<sup>a</sup>, Alexander Davis<sup>a</sup>,  
Athanassia Athanassiou<sup>a</sup> and Ilker S. Bayer<sup>a</sup>

<sup>a</sup> Smart Materials, Istituto Italiano di Tecnologia, via Morego 30, 16163 Genoa, Italy

<sup>b</sup>Nanochemistry Department, Istituto Italiano di Tecnologia, via Morego 30, 16163 Genoa, Italy

**Figure S1:** DSC melting thermograms of the nylon 6,6/GnP composites.

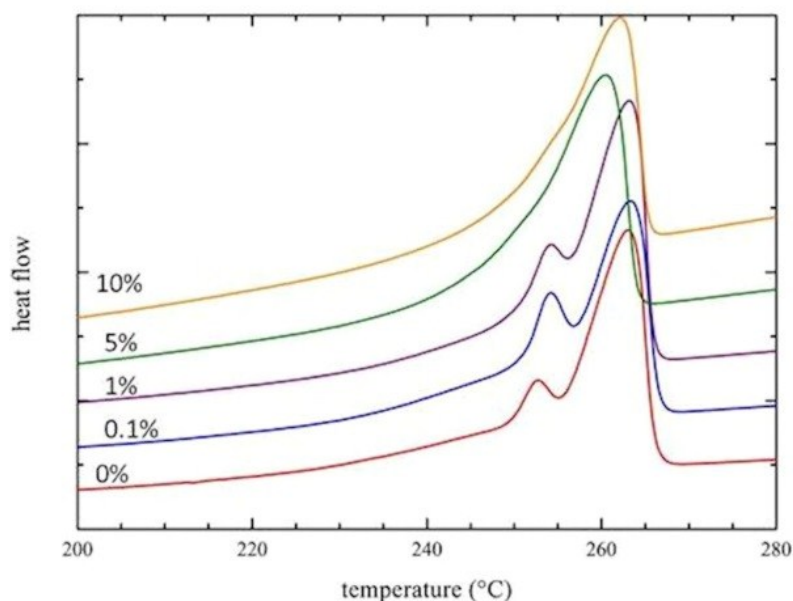

The DSC thermograms of the samples of bare nylon 6,6 and with different GnP loadings are shown in Figure S1. The dissolution of nylon 6,6 in the TFA-acetone solvent gives rise to two melting peaks at 253 °C ( $T_{m1}$ ) and 262 °C ( $T_{m2}$ ).  $T_{m1}$  is generally attributed to less stable crystalline lamellae formed during re-crystallization, while  $T_{m2}$  is due to the highly crystalline lamellae of nylon 6,6 [1], [2], [3]. Upon the GnP addition in the nylon 6,6 matrix  $T_{m1}$  is gradually merged into

$T_{m2}$ , with increasing GnPs load. At the two higher loads the different crystalline domains give rise to one broader melting peak at around 261°C, indicating that the thickening of the more crystalline lamellae is probably unaffected by the re-crystallization.

#### References:

- [1] J.P. Bell, P.E. Slade, J.H. Dumbleton, Multiple melting in nylon 66, Journal of Polymer Science Part A-2: Polymer Physics 6 (1968) 1773-1781.
- [2] L. Li, C.Y. Li, C. Ni, L. Rong, B. Hsiao, Structure and crystallization behavior of Nylon 66/multi-walled carbon nanotube nanocomposites at low carbon nanotube contents, Polymer 48 (2007) 3452-3460.
- [3] G. Zhang, T. Watanabe, H. Yoshida, T. Kawai, Phase Transition Behavior of Nylon-66, Nylon-48, and Blends, Polym J 35 (2003) 173-177.
